# Supplementary material for: Serological Screening for Middle East Respiratory Syndrome Coronavirus and Hepatitis E Virus in Camels in Kazakhstan
Source: MDPI journal article supplement (doi:10.3390/pathogens11111224), 2022-10-24
Supplement: s1 [file s1]

Table S1. A semi-quantitative evaluation of the reactivity against HEV.

| Sample #     | Sample OD | Ratio | Positive Control OD |
|--------------|-----------|-------|---------------------|
| Turkestan 7  | 1.11      | 1.10  | 1.01                |
| Turkestan 15 | 0.85      | 0.84  |                     |
| Turkestan 33 | 0.77      | 0.77  |                     |
| Turkestan 16 | 0.95      | 0.94  |                     |
| Turkestan 9  | 1.01      | 1.01  |                     |
| Turkestan 36 | 0.84      | 0.83  |                     |
| Turkestan 19 | 1.33      | 1.32  |                     |
| Turkestan 20 | 1.50      | 1.48  |                     |
| Turkestan 5  | 1.26      | 1.25  |                     |
| Turkestan 14 | 0.71      | 0.71  |                     |
| Mangystau 11 | 0.78      | 0.72  | 1.08                |
| Mangystau 20 | 1.21      | 1.12  |                     |
| Jambyl 20    | 0.89      | 0.76  | 1.17                |
| Jambyl 45    | 1.26      | 1.16  | 1.09                |
| Jambyl 46    | 1.10      | 1.02  |                     |
| Jambyl 47    | 1.05      | 0.97  |                     |
